# Supplementary material for: A Sendai virus-based expression system directs efficient induction of chondrocytes by transcription factor-mediated reprogramming
Source: PubMed Central journal article supplement — Sci Rep. 2024 Oct 29;14:26004. doi: 10.1038/s41598-024-77508-1 (PMC11522313; doi:10.1038/s41598-024-77508-1), 2024-10-29
Supplement: 41598_2024_77508_MOESM1_ESM.pdf [file 41598_2024_77508_MOESM1_ESM.pdf]

## **Supplementary information**

### **A Sendai virus-based expression system directs efficient induction of chondrocytes by transcription factor-mediated reprogramming**

Jingwen Zhou<sup>1</sup>, Yuya Sekiguchi<sup>1</sup>, Masayuki Sano<sup>2</sup>, Ken Nishimura<sup>1</sup>,  
Koji Hisatake<sup>1\*</sup>, Aya Fukuda<sup>1\*</sup>

**Figure S1**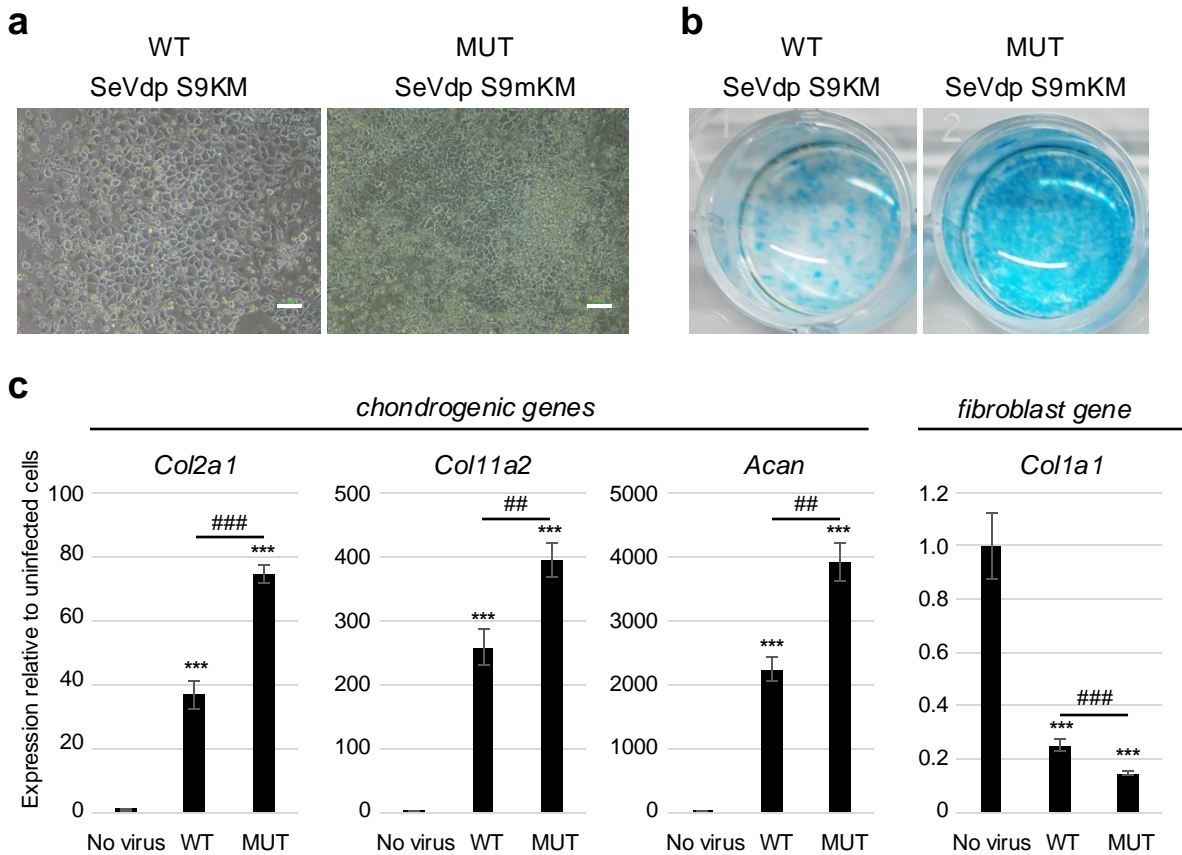

### Induction of chondrocytes by wild-type SOX9- and mutant SOX9<sub>H131A/K398A</sub> (S9m)-expressing SeV vectors

- a** Morphology of chondrocytes induced by wild-type SOX9- or mutant SOX9-expressing SeV vector. Scale bar: 100  $\mu$ m
- b** Alcian blue staining of the differentiated chondrocytes.
- c** Expression of chondrogenic genes and a fibroblast gene in the induced chondrocytes. n = 5. ##p < 0.01, ###p < 0.001. \* represents a significant difference versus uninfected cells (No virus) \*\*\*p < 0.001.

**Figure S2**

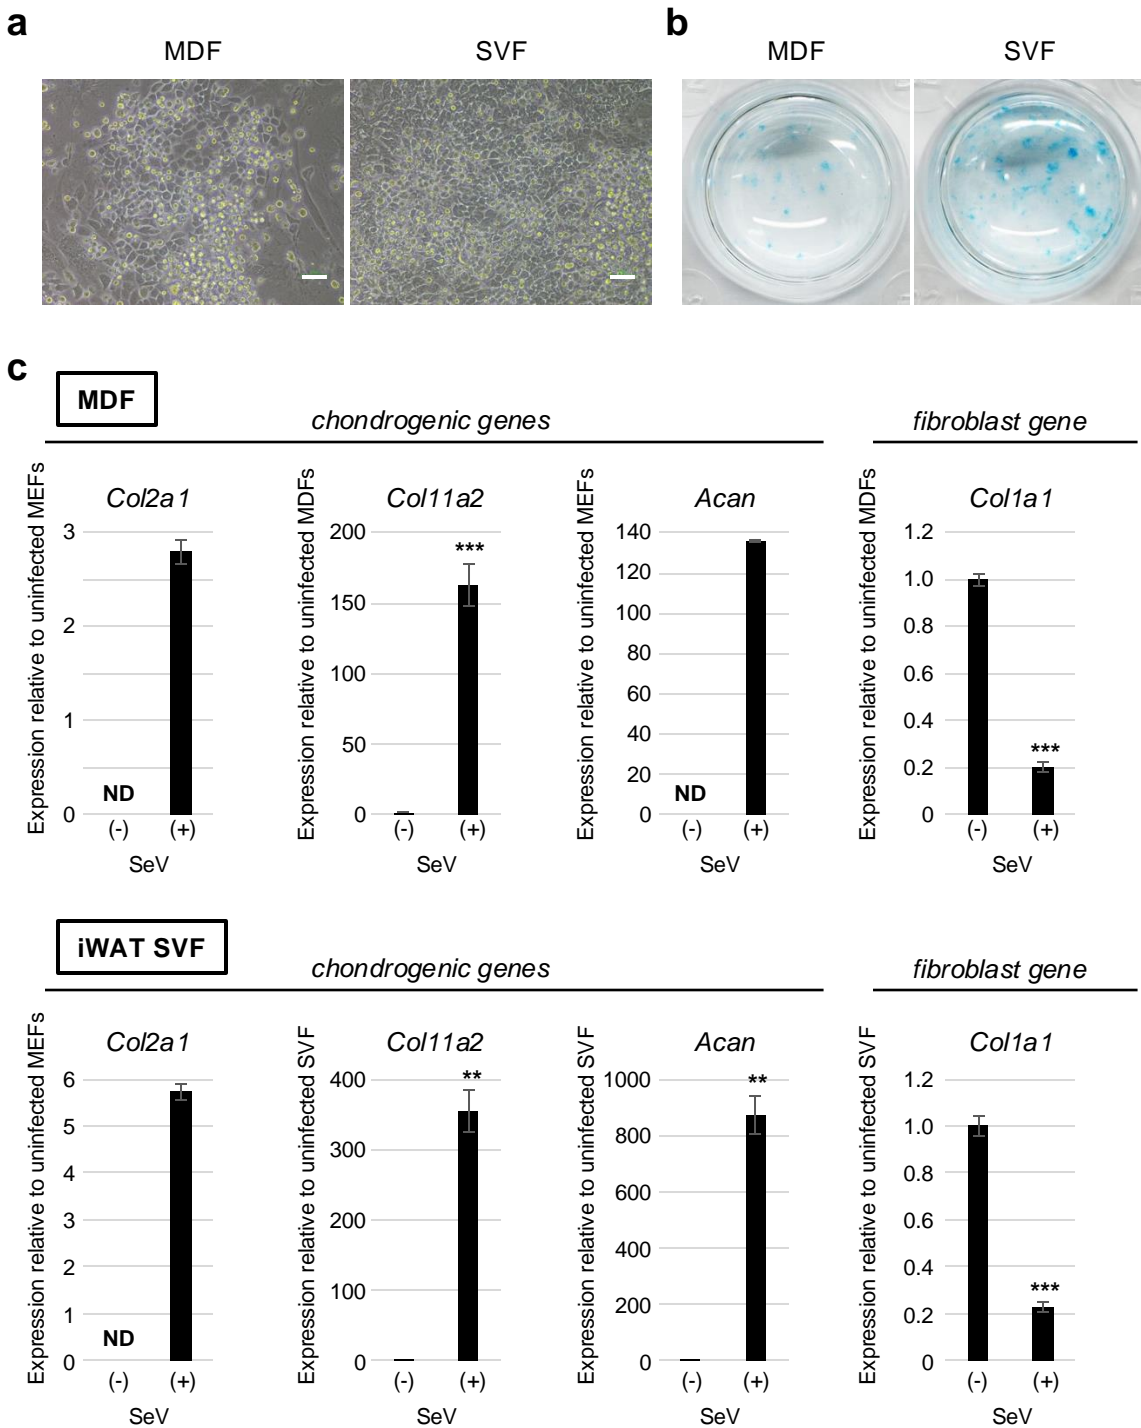

**Induction of chondrocytes from MDFs and iWAT SVF cells by SeVdp S9mKM**

**a** Morphology of chondrocytes induced by the SeV vector (S9mKM). Scale bar: 50  $\mu$ m

**b** Alcian blue staining of the differentiated chondrocytes.

**c** Expression of chondrogenic genes and a fibroblast gene in the induced chondrocytes. n = 3. \* represents a significant difference versus uninfected cells (-).

\*\*p < 0.01, \*\*\*p < 0.001. ND: not detected.

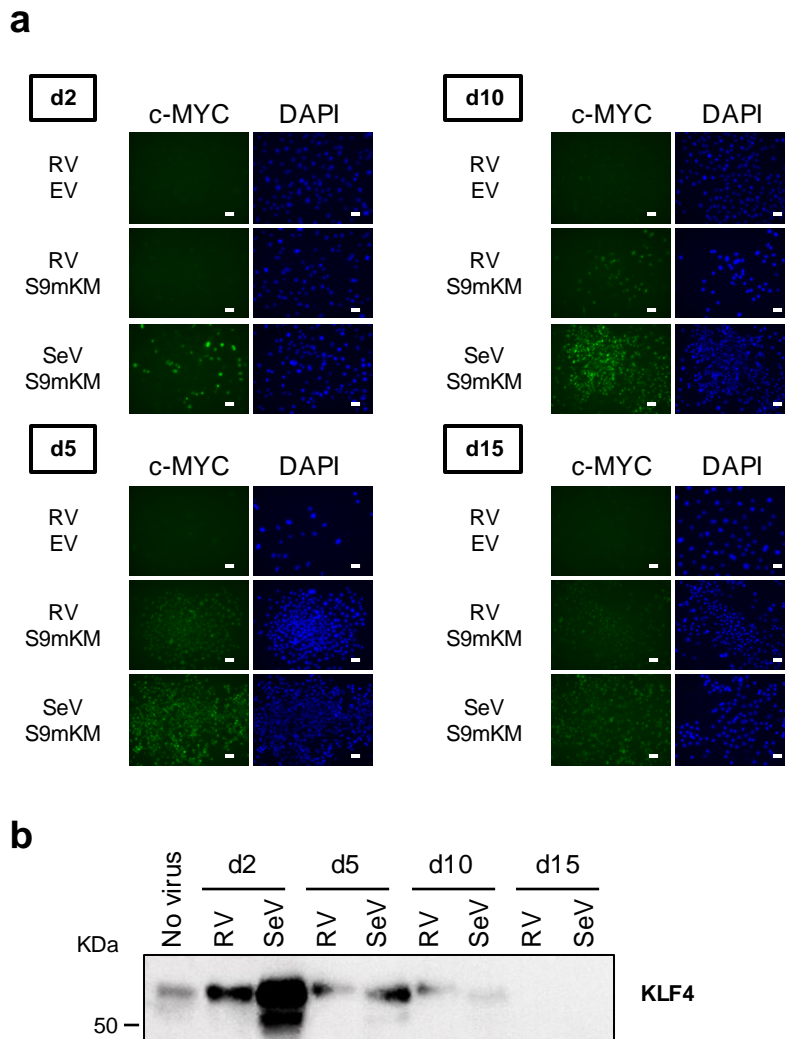

**Rapid and strong expression of the reprogramming factors by the Sendai virus vector**

- a** Immunofluorescence staining of the retrovirus (RV)- or Sendai virus (SeV)-infected cells using an anti-c-MYC antibody.
- b** Western blotting analysis of KLF4 expression in RV- or SeV-infected cells.

Figure S4

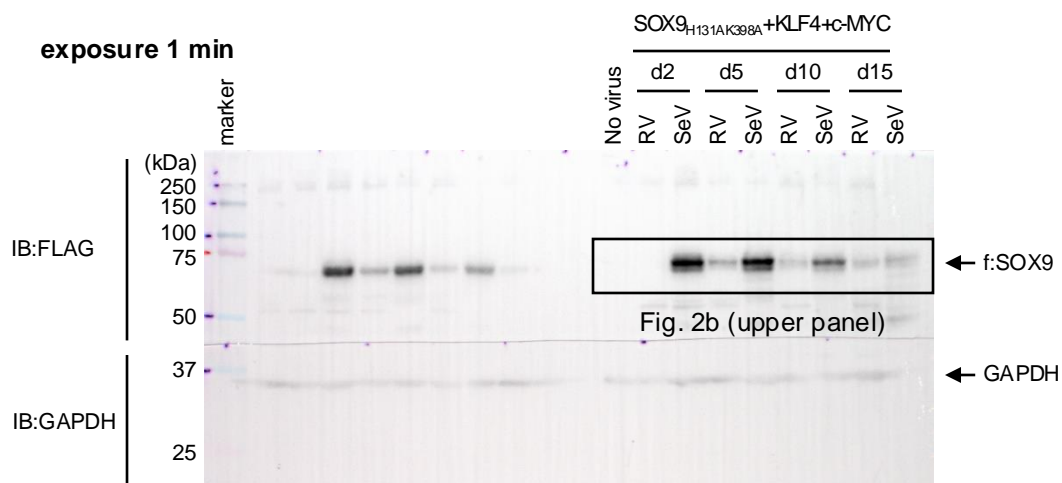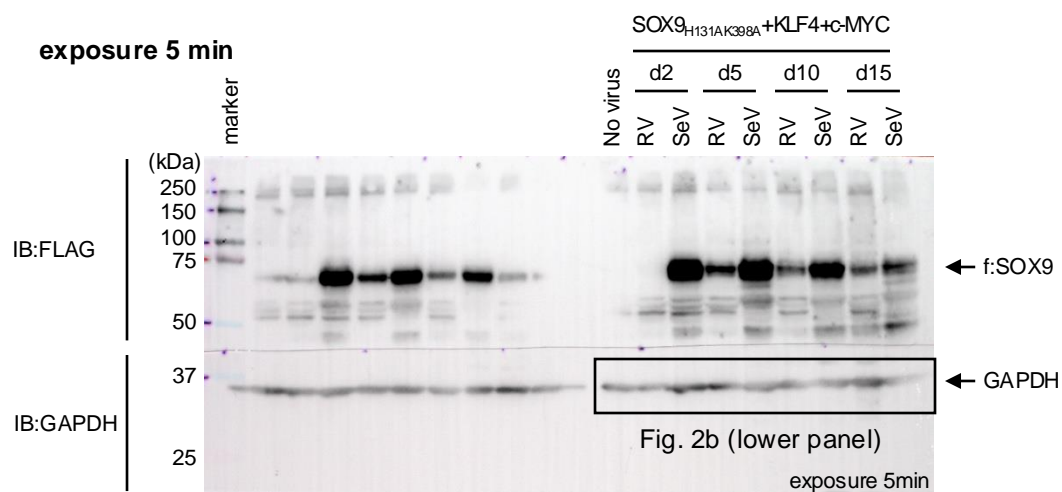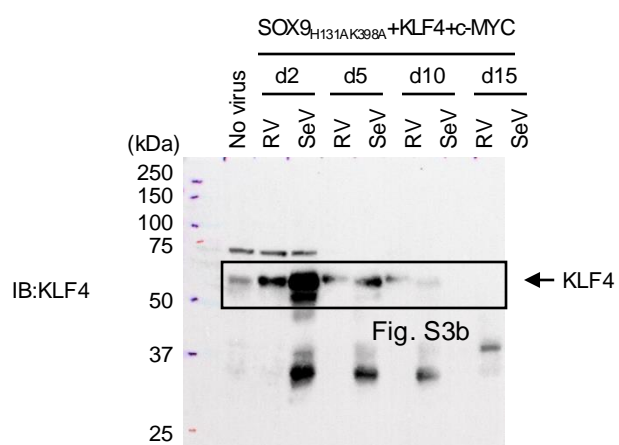

Full length immunoblots shown in Fig. 2b and Fig. S3b.

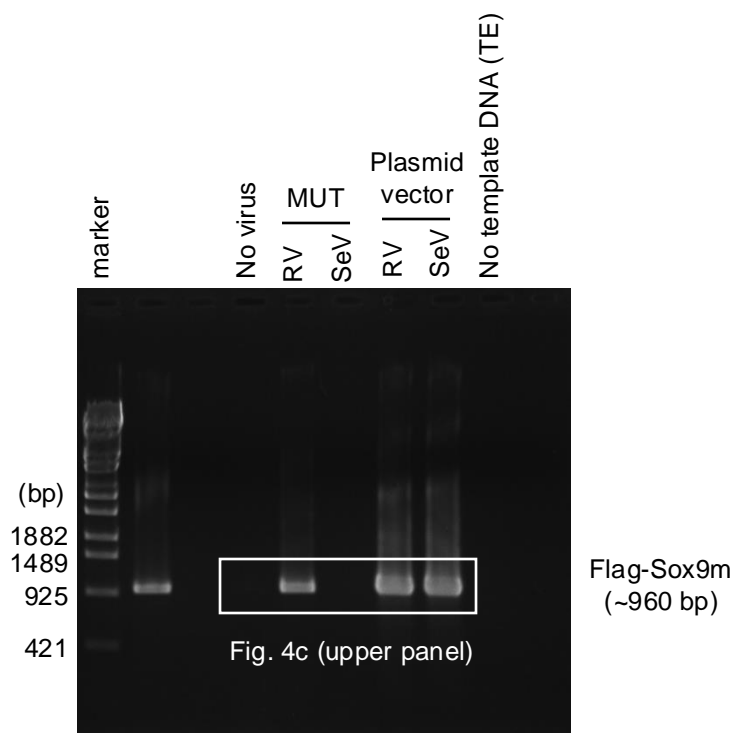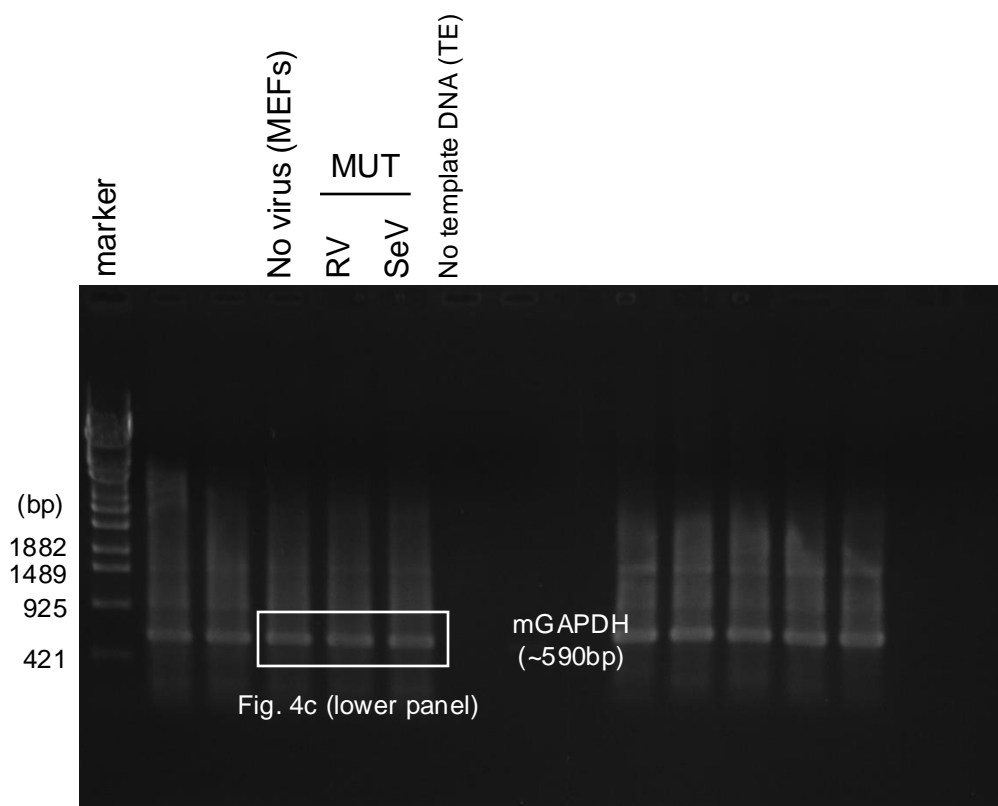

Full length agarose gel images shown in Fig. 4c.

Supplementary Table S1

Antibodies used in this study

|                                              |                                         |                            |
|----------------------------------------------|-----------------------------------------|----------------------------|
| Anti-DYKDDDDK (Flag) tag antibody            | Wako, 012-22384, mouse monoclonal       | 1:1000 (IF)<br>1:1500 (IB) |
| Anti- GKLF (KLF4) antibody (H-180)           | Santa Cruz, sc-20691, rabbit polyclonal | 1:500 (IF)                 |
| Anti-KLF4 antibody                           | prepared in our lab, rabbit polyclonal  | 1:500 (IB)                 |
| Anti- c-MYC antibody (Y-69)                  | Abcam, ab32072, rabbit monoclonal       | 1:400 (IF)                 |
| Alexa Fluor™ 488 donkey anti-mouse IgG (H+L) | Thermo Fisher Scientific, A21202        | 1:1000 (IF)                |
| Alexa Fluor® 555 goat anti-rabbit IgG (H+L)  | Thermo Fisher Scientific, A21428        | 1:1000 (IF)                |
| Anti- COL2A1 antibody (M2139)                | Santa Cruz, sc-52658, mouse monoclonal  | 1:50 (IF)                  |
| Anti- COL1A1 antibody (3G3)                  | Santa Cruz, sc-293182, mouse monoclonal | 1:50 (IF)                  |
| Anti-GAPDH antibody (6C5)                    | Santa Cruz, sc-32233, mouse monoclonal  | 1:1000 (IB)                |
| Anti-Mouse IgG, HRP-Linked Whole Ab Sheep    | Cytiva, NA931V                          | 1:3000 (IB)                |

IF : immunofluorescent staining

IB : immunoblotting

Supplementary Table S2

## Primers used for qPCR

|                              |                             |
|------------------------------|-----------------------------|
| m <i>Col2a1</i> Forward      | TGGCCTTAGTGCAGGAACTTC       |
| m <i>Col2a1</i> Reverse      | ACCACCAGCCTTCTCGTCA         |
| m <i>Coll1a2</i> Forward     | AGACCAGCCCTTATGTCAAGGA      |
| m <i>Coll1a2</i> Reverse     | ACCGTCCGGCCTTGCT            |
| m <i>Acan</i> Forward        | TCTCCAGGTGCAGCTGAAGTC       |
| m <i>Acan</i> Reverse        | TGGGCGATAGTGGAATACAACCTC    |
| m <i>Sox5</i> Forward        | TGATGGATTTCAATATGAGTGGAGAT  |
| m <i>Sox5</i> Reverse        | TCCCTGTAAATTCTTGACTCTGAGACT |
| m <i>Sox6</i> Forward        | GGACCAGCCCTGTAACCTCAAGT     |
| m <i>Sox6</i> Reverse        | GGCCGGGATGAGAGATTCA         |
| m <i>Sox9 (endo)</i> Forward | CCCCGGTTTCGTTCTCTGTT        |
| m <i>Sox9 (endo)</i> Reverse | TCAGCTGCCGGCTCTAAAC         |
| m <i>Coll1a1</i> Forward     | CCCTGGCCTGGAGGAA            |
| m <i>Coll1a1</i> Reverse     | CAGCTGATTTTTTCATCATAGCCA    |
| m <i>Coll1a2</i> Forward     | CACAGTGGTATGGATGGATTAAAGG   |
| m <i>Coll1a2</i> Reverse     | GCTTGACCTGGAGTTCCATTCT      |
| m <i>Nono</i> Forward        | GCTCTGGACAGATGCAGTGAAG      |
| m <i>Nono</i> Reverse        | CAGTCACAGGCCGAGGAAA         |
| m <i>Col10a1</i> Forward     | GCTGCCCCACGCATCTC           |
| m <i>Col10a1</i> Reverse     | GGTATTTGAGGCAGCATATTTTCA    |
| m <i>Mmp13</i> Forward       | CCACTCCCTAGGTCTGGATCA       |
| m <i>Mmp13</i> Reverse       | TCAAGGGATAGGGCTGGGTC        |
| SeV genome RNA Forward       | TCAGTCTCTTACGTCTCTCACAG     |
| SeV genome RNA Reverse       | CAGAAGGGTTTTGGGAGGA         |



Supplementary Table S3

Primers used for genome PCR

|                         |                          |
|-------------------------|--------------------------|
| Flag Forward            | GACTACAAAGACGACGATGACAAA |
| mSox9 Reverse           | GCCGTAGCTGCCCGTGTAGGT    |
| mGapdh intron 1 Forward | TGTACGGGTCTAGGGATGCT     |
| mGapdh intron 2 Reverse | TATGCACCTCACAACGCCAT     |
